# Supplementary material for: A carbon allotrope with twisted Dirac cones induced by grain boundaries composed of pentagons and octagons
Source: Royal Society of Chemistry journal article supplement (doi:10.1039/d2cp05271g), 2023-01-01
Supplement: d2cp05271g1.pdf [file d2cp05271g1.pdf]

**Supplemental Material for “A carbon allotrope with twisted Dirac cones induced  
by grain boundaries composed of pentagons and octagons”**

Weixiang Kong<sup>a</sup>, Xiaoliang Xiao<sup>a</sup>, Fangyang Zhan<sup>a</sup>, Rui Wang<sup>a</sup>, Li-Yong Gan<sup>a</sup>, Juan Wei<sup>a</sup>, Jing  
Fan<sup>b</sup>, and Xiaozhi Wu<sup>a\*</sup>

<sup>a</sup>Institute for Structure and Function and Department of Physics, Chongqing University,  
Chongqing 401331, People’s Republic of China

<sup>b</sup>Center for Computational Science and Engineering, Southern University of Science and  
Technology, Shenzhen 518055, People’s Republic of China

|                                  | Ring         | E (eV/atom)   | Electronic property  |
|----------------------------------|--------------|---------------|----------------------|
| <b>Graphyne</b>                  | <b>6</b>     | <b>0.64</b>   | <b>semimetal</b>     |
| <b>Biphenylene</b>               | <b>4,6,8</b> | <b>0.468</b>  | <b>metal</b>         |
| <b>TPH-graphene</b>              | <b>5,6,7</b> | <b>0.396</b>  | <b>metal</b>         |
| <b>127-11-84-r568-1</b>          | <b>5,6,8</b> | <b>0.377</b>  | <b>semimetal</b>     |
| <b>PHH-graphene</b>              | <b>5,6,7</b> | <b>0.319</b>  | <b>semimetal</b>     |
| <b>Hopgraphene</b>               | <b>5,6,8</b> | <b>0.25</b>   | <b>metal</b>         |
| <b>Phagraphene</b>               | <b>5,6,7</b> | <b>0.19</b>   | <b>semimetal</b>     |
| <b>(SF)<sub>4</sub>-graphene</b> | <b>4,6,8</b> | <b>0.1732</b> | <b>semimetal</b>     |
| <b>SW graphene</b>               | <b>5,6,7</b> | <b>0.15</b>   | <b>semimetal</b>     |
| <b>SW40</b>                      | <b>5,6,7</b> | <b>0.13</b>   | <b>semimetal</b>     |
| <b>Graphene</b>                  | <b>6</b>     | <b>0</b>      | <b>semimetal</b>     |
| <b>[1]PHO-graphene</b>           | <b>5,6,8</b> | <b>0.3236</b> | <b>semimetal</b>     |
| <b>[2]PHO-graphene</b>           | <b>5,6,8</b> | <b>0.2704</b> | <b>metal</b>         |
| <b>[3]PHO-graphene</b>           | <b>5,6,8</b> | <b>0.2294</b> | <b>metal</b>         |
| <b>[4]PHO-graphene</b>           | <b>5,6,8</b> | <b>0.1982</b> | <b>semimetal</b>     |
| <b>[5]PHO-graphene</b>           | <b>5,6,8</b> | <b>0.1735</b> | <b>metal</b>         |
| <b>[6]PHO-graphene</b>           | <b>5,6,8</b> | <b>0.1546</b> | <b>semiconductor</b> |
| <b>[7]PHO-graphene</b>           | <b>5,6,8</b> | <b>0.1394</b> | <b>semimetal</b>     |

Table.S1 Average atomic energy and electronic property of carbon allotropes.

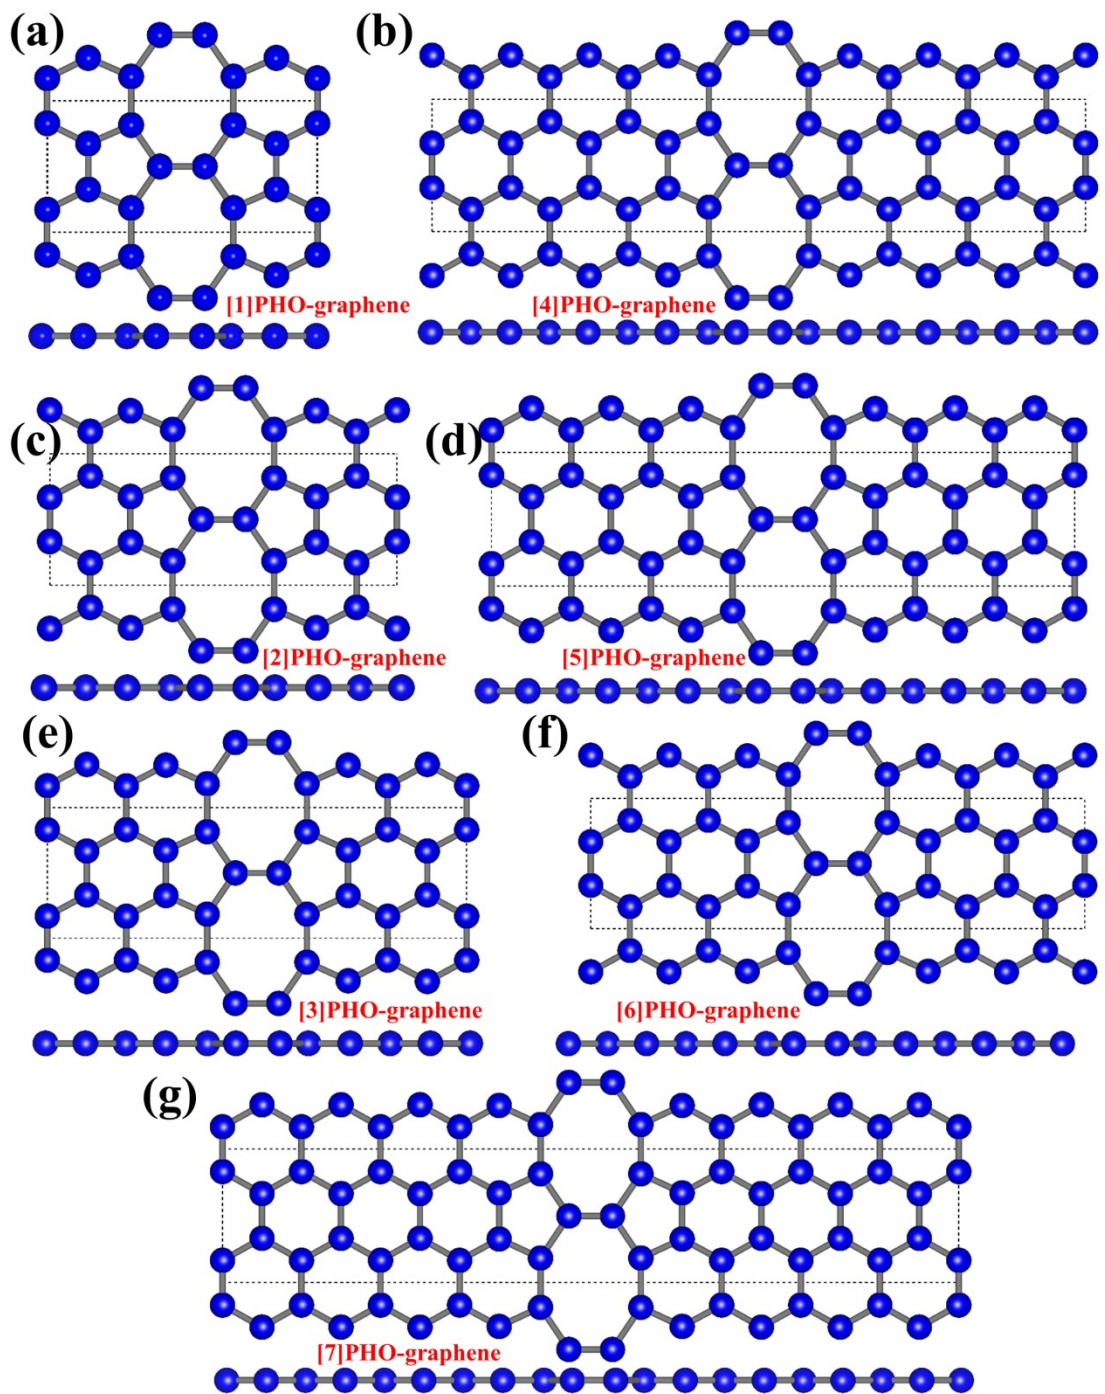

Fig.S1 The structure of [N]PHO-graphene. The rectangular primitive cell is represented by a black dash line.

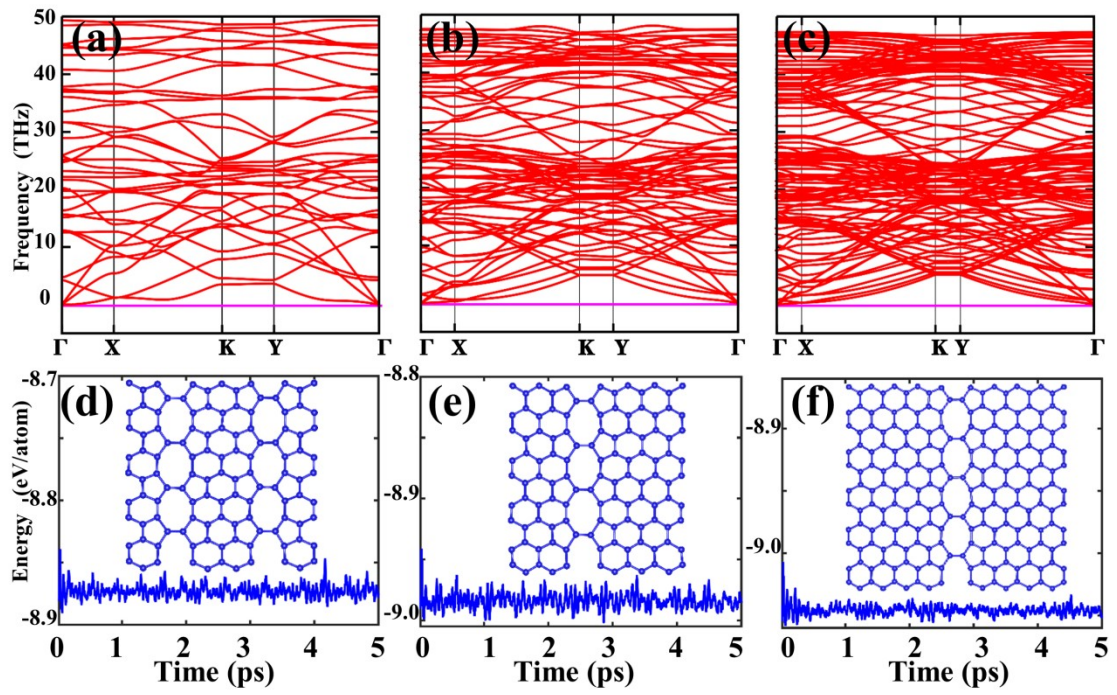

Fig.S2 Phonon spectrum of (a) [1]PHO-graphene, (b) [4]PHO-graphene and (c) [7]PHO-graphene. Molecular dynamics simulations of (d) [1]PHO-graphene, (e) [4]PHO-graphene and (f) [7]PHO-graphene.

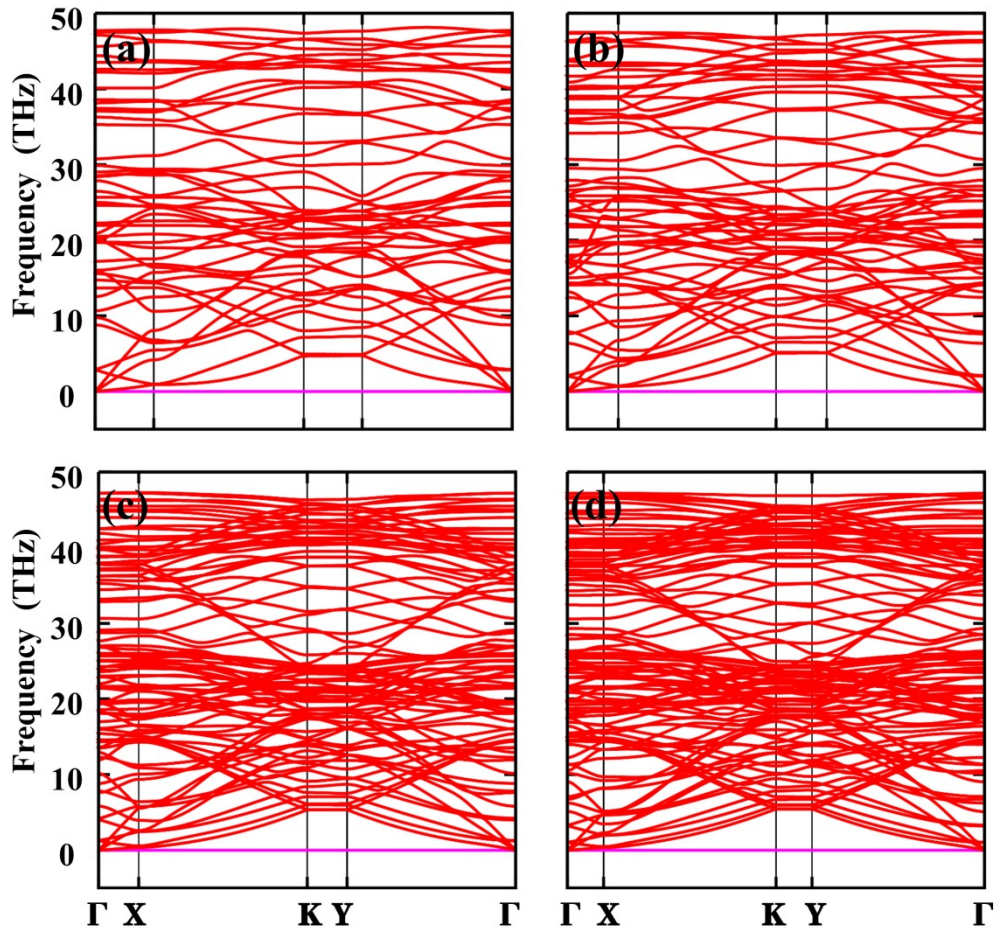

Fig.S3 Phonon spectrum of (a) [2]PHO-graphene, (b) [3]PHO-graphene, (c) [5]PHO-graphene and (d) [6]PHO-graphene.

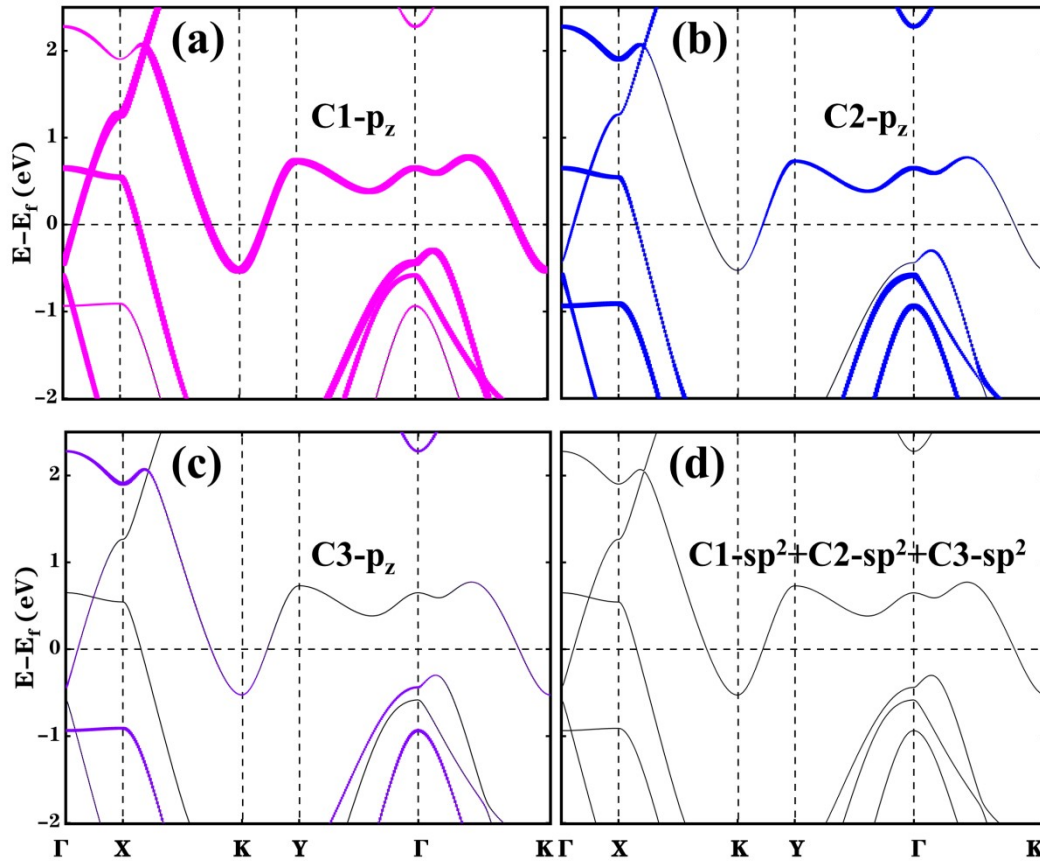

Fig.S4 The contribution of different carbon atoms to the bands around Fermi energy.

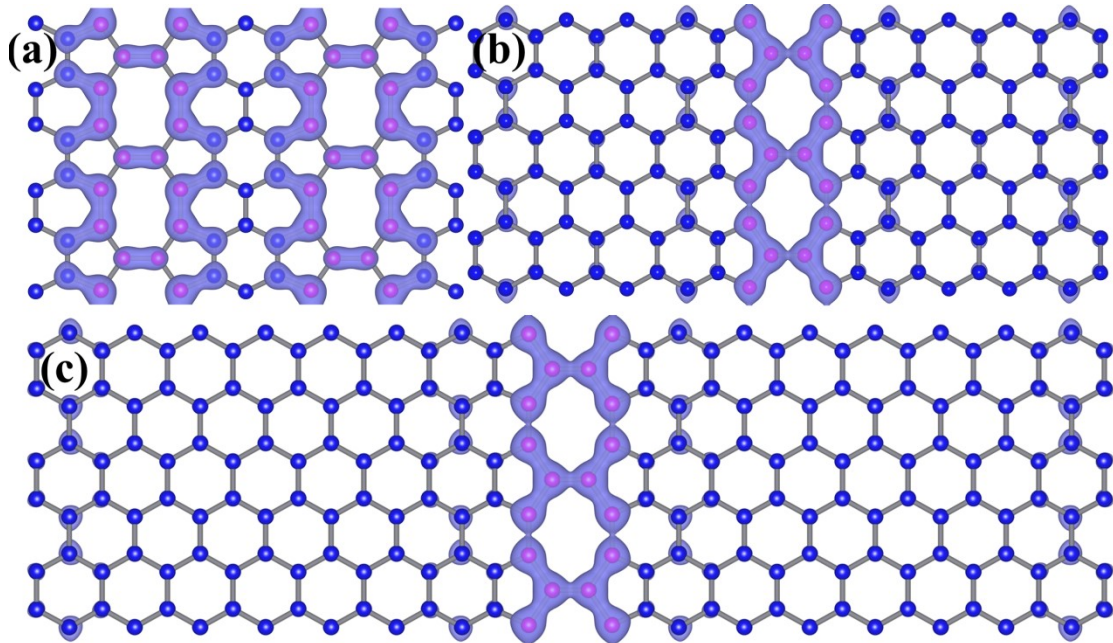

Fig.S5 The charge distribution near the Fermi energy of PHO-graphene, their behavior at the grain boundary is like a quasi-one-dimensional metallic wire.

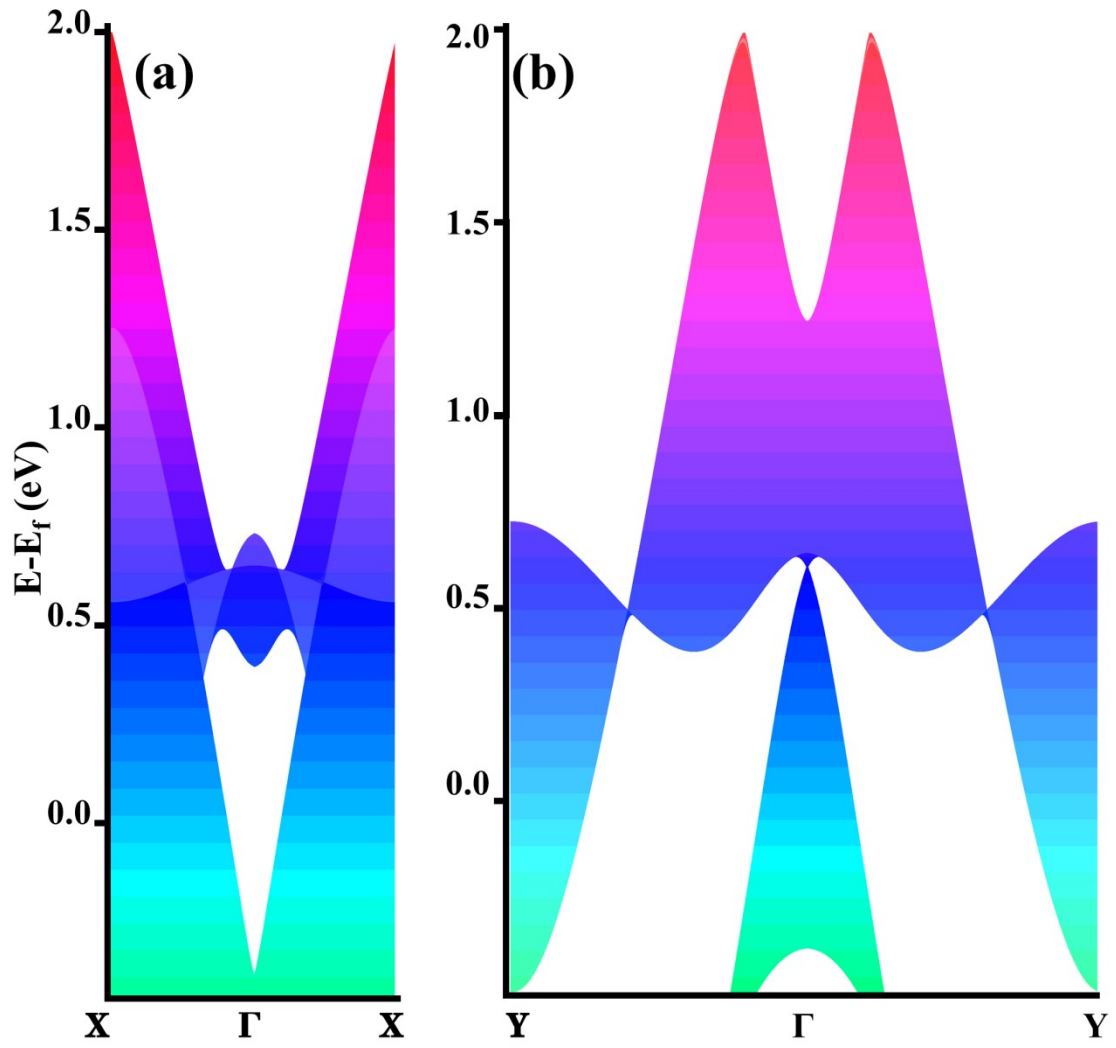

Fig.S6 The 3D band spectrum of [1]PHO-graphene. It can clearly observe the details of the bulk band.

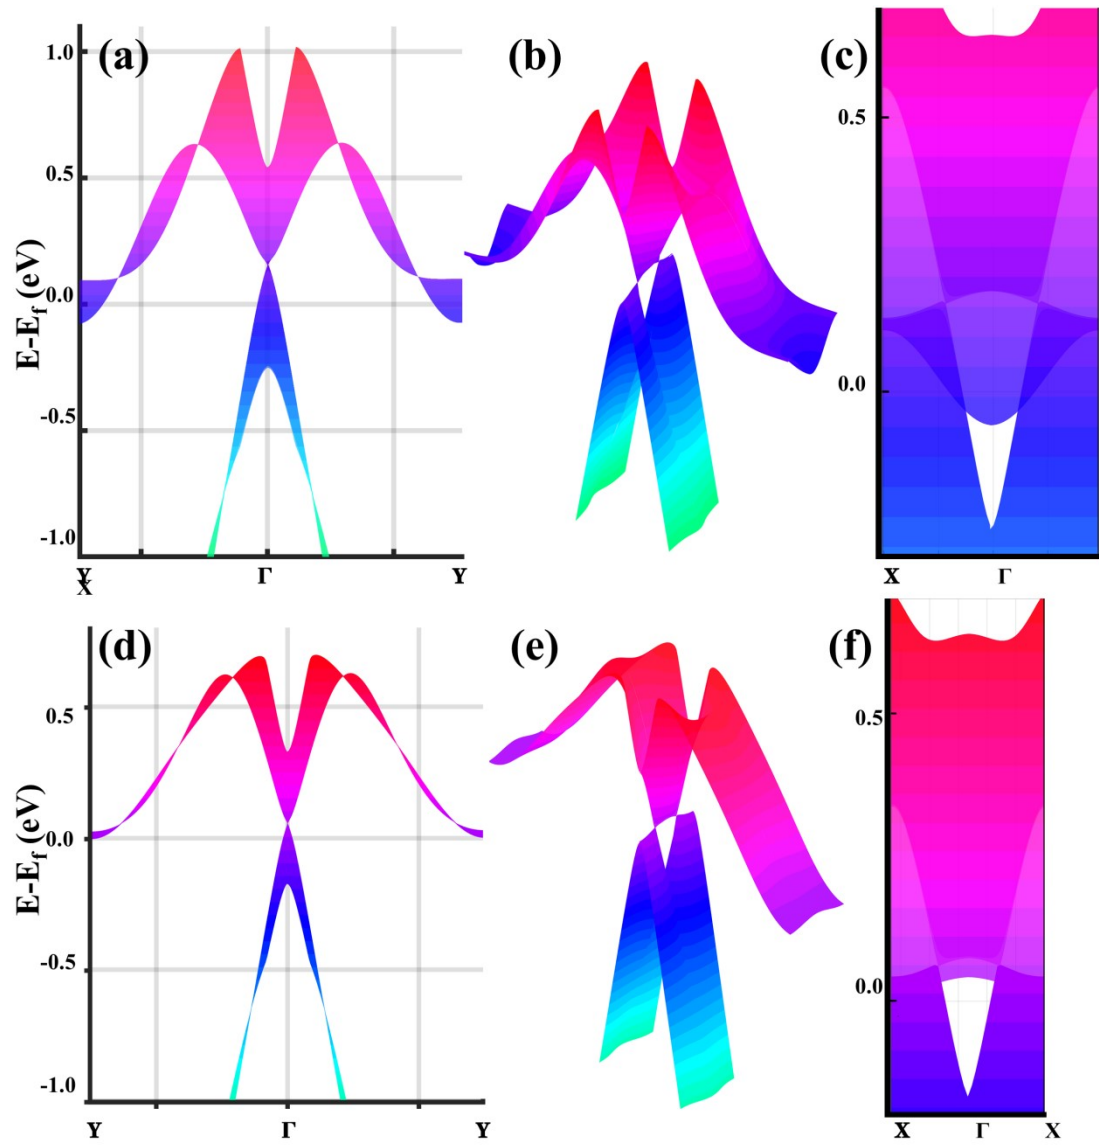

Fig.S7 The 3D band spectrum is implemented from three distinct perspectives of [4]PHO-graphene and [7]PHO-graphene to display the distorted Dirac cone features.

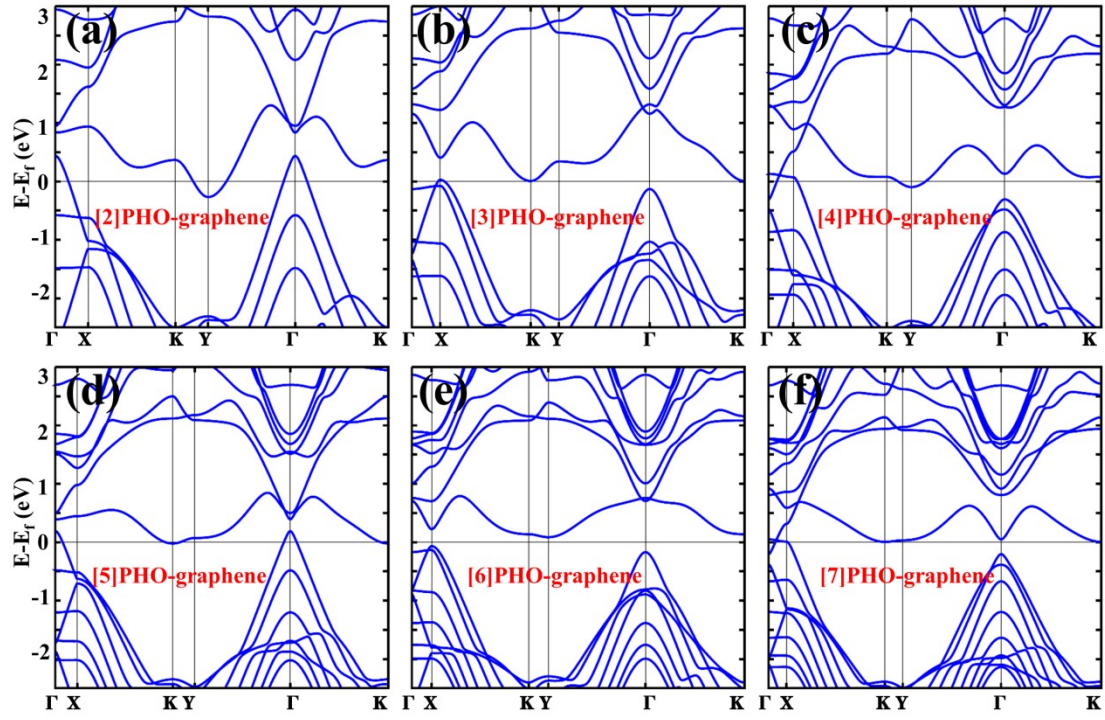

Fig.S8 It can be clearly observed that the electronic properties of PHO-graphene switch between metals, semimetals and even semiconductors.
